# Supplementary material for: Preclinical Assessment of Paclitaxel- and Trastuzumab-Delivering Magnetic Nanoparticles Fe3O4 for Treatment and Imaging of HER2-Positive Breast Cancer
Source: Front Med (Lausanne). 2021 Oct 28;8:738775. doi: 10.3389/fmed.2021.738775 (PMC8581045; doi:10.3389/fmed.2021.738775)
Supplement: Supplementary file 3 [file Data_Sheet_1.xlsx]

## Sheet: Sheet1
Crontrol	MNPs-Fe3O4	PTX and Herceptin	PTX-Herceptin- MNPs-Fe3O4
4.66	5.21	20.33	31.95
Crontrol	MNPs-Fe3O4	PTX and Herceptin	PTX-Herceptin- MNPs-Fe3O4
0	6.23	52.68	70.14
1.123	1.025	0.478	0.247
5ug/mL	10ug/mL	20ug/mL	40ug/mL	80ug/Ml
3.1	4.22	3.75	4.6
